# Supplementary material for: Decomposition of nitrous oxide over Co-zeolite catalysts: role of zeolite structure and active site
Source: Royal Society of Chemistry journal article supplement (doi:10.1039/c2cy00465h), 2012-01-01
Supplement: c2cy00465h.pdf [file c2cy00465h.pdf]

# Supporting Information

## Decomposition of nitrous oxide over Co-zeolite catalysts: role of zeolite structure and active site

Xinyan Zhang<sup>1</sup>, Qun Shen<sup>1</sup>, Chi He<sup>1</sup>, Chunyan Ma<sup>1</sup>, Jie Cheng<sup>1</sup>, Zhiming Liu<sup>2\*</sup>,  
Zhengping Hao<sup>1\*</sup>

*1. Department of Environmental Nano-materials, Research Center for Eco-Environmental Sciences,  
Chinese Academy of Sciences, Beijing 100085, P. R. China*

*2. Beijing University Chemical Technology, State Key Laboratory Chemical Resource Engineering,  
Beijing 100029, Peoples R China*

Corresponding author:

\* Prof. ZM Liu: Tel./Fax: +86-10-64427356

liuzm@mail.buct.edu.cn

\* Prof. ZP Hao: Tel./Fax: +86-10-62923564

Email: zpinghao@rcees.ac.cn

This Supporting Information includes:

1. Table S1

2. Figure S1

Table S1 Percentage of subband areas derived by deconvoluting UV-vis spectra and corresponding Co species loading

| Catalyst               | <sup>a</sup> I <sub>α</sub> | <sup>a</sup> I <sub>β</sub> | <sup>a</sup> I <sub>γ</sub> | <sup>a</sup> I <sub>Co</sub> | <sup>a</sup> I <sub>Co3O4</sub> | <sup>a</sup> I <sub>CoO</sub> | <sup>b</sup> Coα | <sup>b</sup> Coβ | <sup>b</sup> Coγ | <sup>b</sup> Co <sup>2+</sup> | <sup>b</sup> Co <sub>3</sub> O <sub>4</sub> | <sup>b</sup> CoO <sub>x</sub> |
|------------------------|-----------------------------|-----------------------------|-----------------------------|------------------------------|---------------------------------|-------------------------------|------------------|------------------|------------------|-------------------------------|---------------------------------------------|-------------------------------|
|                        | (%)                         | (%)                         | (%)                         | (%)                          | (%)                             | (%)                           | (%)              | (%)              | (%)              | (%)                           | (%)                                         | (%)                           |
| Co-ZSM-5 <sub>16</sub> | 10.33                       | 68.94                       | 5.27                        | 84.54                        | 13.46                           | 0.00                          | 0.04             | 0.24             | 0.02             | 0.30                          | 0.05                                        | 0.00                          |
| Co-ZSM-5 <sub>24</sub> | 10.12                       | 60.44                       | 9.10                        | 79.66                        | 15.86                           | 4.48                          | 0.06             | 0.33             | 0.05             | 0.44                          | 0.09                                        | 0.02                          |
| Co-BEA <sub>24</sub>   | 11.76                       | 52.71                       | 10.3                        | 73.77                        | 23.67                           | 0.00                          | 0.07             | 0.32             | 0.06             | 0.45                          | 0.14                                        | 0.00                          |
| Co-BEA <sub>30</sub>   | 4.57                        | 54.04                       | 4.33                        | 62.94                        | 30.42                           | 6.64                          | 0.03             | 0.35             | 0.03             | 0.40                          | 0.19                                        | 0.04                          |
| Co-MOR <sub>52</sub>   | 22.18                       | 60.35                       | 1.56                        | 83.75                        | 14.25                           | 2.00                          | 0.50             | 1.36             | 0.04             | 1.89                          | 0.32                                        | 0.05                          |
| Co-MOR <sub>70</sub>   | 3.27                        | 75.16                       | 1.33                        | 79.7                         | 21.3                            | 0.00                          | 0.10             | 2.32             | 0.04             | 2.46                          | 0.66                                        | 0.00                          |
| Co-USY <sub>36</sub>   | 3.57                        | 7.14                        | 7.14                        | 17.86                        | 62.5                            | 20.83                         | 0.03             | 0.06             | 0.06             | 0.15                          | 0.53                                        | 0.17                          |
| Co-USY <sub>42</sub>   | 3.06                        | 19.39                       | 0.00                        | 22.45                        | 39.8                            | 37.45                         | 0.03             | 0.19             | 0.00             | 0.22                          | 0.39                                        | 0.37                          |

<sup>a</sup> Calculated from the data in Fig. 4.

<sup>b</sup> in wt. %.

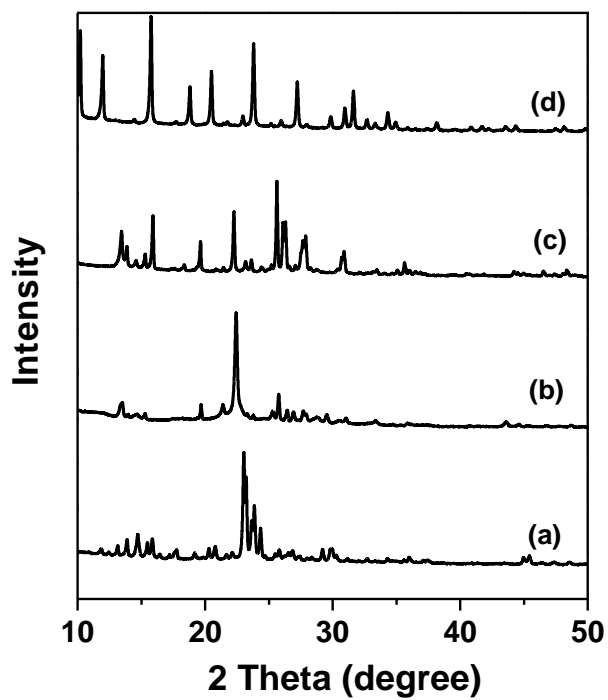

**Fig. S1** XRD patterns of Co-ZSM-5<sub>24</sub> (a), Co-BEA<sub>30</sub> (b), Co-MOR<sub>70</sub> (c), and Co-USY<sub>42</sub> (d).
